# Supplementary material for: Integrating transcription factor occupancy with transcriptome-wide association analysis identifies susceptibility genes in human cancers
Source: PubMed Central journal article supplement (PMC9675749; doi:10.1038/s41467-022-34888-0), 2022-11-19
Supplement: 41467_2022_34888_MOESM2_ESM.pdf [file 41467_2022_34888_MOESM2_ESM.pdf]

## Description of Additional Supplementary Files

**File Name:** Supplementary Data 1

**Description:** GWAS summary statistics data of European descendants for breast, ovarian, colorectal, pancreatic, prostate and lung cancers used in this study.

**File Name:** Supplementary Data 2

**Description:** Prioritized putative TF-occupied variants (i.e. 50K to 500K) selected from susceptible TF-occupied elements based on associations with cancer risk from our previous work (i.e., beta coefficient; Wen et al., Nature communications, 2021; PMID: 34518541).

**File Name:** Supplementary Data 3

**Description:** Breast cancer association results for genes identified from S-PrediXcan, EpiXcan, Fusion and sTF-TWAS conducted for each set of variants selected from STFCREs. The *P*-values are the raw *P*-values from the Z score test from TWAS (two-sided).

**File Name:** Supplementary Data 4

**Description:** Prostate cancer association results for genes identified from S-PrediXcan, EpiXcan, Fusion and sTF-TWAS conducted for each set of variants selected from STFCREs. The *P*-values are the raw *P*-values from the Z score test from TWAS (two-sided).

**File Name:** Supplementary Data 5

**Description:** Lung cancer association results for genes identified from S-PrediXcan, EpiXcan, Fusion and sTF-TWAS conducted for each set of variants selected from STFCREs. The *P*-values are the raw *P*-values from the Z score test from TWAS (two-sided).

**File Name:** Supplementary Data 6

**Description:** Putative susceptibility genes identified from sTF-TWAS (50K), at a Bonferroni-corrected  $P < 0.05$  (gene expression prediction at  $R^2 > 0.01$ ). The *P*-values are the raw *P*-values from the Z score test from TWAS (two-sided).

**File Name:** Supplementary Data 7

**Description:** Putative susceptibility genes identified from sp-sTF-TWAS (50K), at a Bonferroni-corrected  $P < 0.05$  (gene expression prediction at  $R^2 > 0.1$ ). The *P*-values are the raw *P*-values from the Z score test from TWAS (two-sided).

**File Name:** Supplementary Data 8

**Description:** Comparison between genes identified from sTF-TWAS (50K) and sp-sTF-TWAS (50K) in this study and those previously reported in the literature (Breast Cancer).

**File Name:** Supplementary Data 9

**Description:** Comparison between genes identified from sTF-TWAS (50K) and sp-sTF-TWAS(50K) in this study and those previously reported in the literature (Prostate Cancer).

**File Name:** Supplementary Data 10

**Description:** Comparison between genes identified from sTF-TWAS (50K) and sp-sTF-TWAS (50K) in this study and those previously reported in the literature (Lung Cancer).

**File Name:** Supplementary Data 11

**Description:** A comparison of genes identified from S-PrediXcan and sp-TF-TWAS (50K) in breast cancer. The *P*-values are the raw *P*-values from the *Z* score test from TWAS (two-sided).

**File Name:** Supplementary Data 12

**Description:** A comparison of genes identified from S-PrediXcan and sp-TF-TWAS (50K) in prostate cancer. The *P*-values are the raw *P*-values from the *Z* score test from TWAS (two-sided).

**File Name:** Supplementary Data 13

**Description:** A comparison of genes identified from S-PrediXcan and sp-TF-TWAS (50K) in lung cancer. The *P*-values are the raw *P*-values from the *Z* score test from TWAS (two-sided).

**File Name:** Supplementary Data 14

**Description:** Association results for genes identified from S-PrediXcan and sTF-TWAS (50K) for brain disorders: schizophrenia, Alzheimer's disease and autism spectrum. The *P*-values are the raw *P*-values from the *Z* score test from TWAS (two-sided).

**File Name:** Supplementary Data 15

**Description:** TF ChIP-seq data in cancer related target tissues and cell lines for prostate cancer, lung cancer and brain diseases.

**File Name:** Supplementary Data 16

**Description:** A detailed information on the CRISPR data of the cancer models/cell lines, from DepMap Portal.
